# Supplementary material
Source: publisher figshare collection journal article supplement (https://asha.figshare.com/articles/dataset/_/7336055)
Supplement: Supplementary file 1 [file 1]

**Supplemental Material S5.** Intervention fidelity data sheet for Spontaneous Production phase.

**Spontaneous Production Phase**

**Subject:**

**Date:**

**Session:**

**1 Welcome child and ask what sound you're working on**

Child's response:

**2 Read story related to daily treatment theme, or child's choice**

Time began:

Time ended:

**3 Drill play activities**

Time began:

Time ended:

|                    |                                                         |
|--------------------|---------------------------------------------------------|
| <i>Activity 1:</i> | <b><i>Go Fish OR Memory</i></b> with treatment pictures |
| <i>Activity 2:</i> |                                                         |
| <i>Activity 3:</i> |                                                         |
| <i>Activity 4:</i> |                                                         |
| <i>Activity 5:</i> |                                                         |
| <i>Activity 6:</i> |                                                         |

**5 Target sound in at least 100 trials**

Number of treatment trials:

**6 Session length - target 50 minutes**

Time began:

Time ended:
