# Supplementary material
Source: publisher figshare collection journal article supplement (https://asha.figshare.com/articles/dataset/_/7336055)
Supplement: Supplementary file 2 [file 1]

**Supplemental Material S3.** Neighborhood density, phonotactic probability, Kučera and Francis (1967) word frequency (WF), log 10 WF, and age of acquisition (in years) measurements (AoA) for the high-frequency (HF) words.

| <b>HF</b>      | <b>Density</b> | <b>Number of phonemes</b> | <b>Phoneme probability sum</b> | <b>Biphone probability sum</b> | <b>Kučera &amp; Francis WF</b> | <b>log 10 WF</b> | <b>AoA</b>  |
|----------------|----------------|---------------------------|--------------------------------|--------------------------------|--------------------------------|------------------|-------------|
| ready          | 8.00           | 4.00                      | 0.2048                         | 0.0149                         | 143                            | 4.296            | 5.53        |
| reading        | 14.00          | 5.00                      | 0.2395                         | 0.0443                         | 140                            | 3.496            | 4.11        |
| really         | 3.00           | 4.00                      | 0.1768                         | 0.0068                         | 275                            | 4.884            | 5.94        |
| running        | 7.00           | 5.00                      | 0.3074                         | 0.0507                         | 123                            | 3.906            | 4.47        |
| river          | 12.00          | 5.00                      | 0.2087                         | 0.0091                         | 165                            | 3.452            | 4.90        |
| little         | 3.00           | 5.00                      | 0.2281                         | 0.0141                         | 831                            | 4.868            | 3.95        |
| lost           | 11.00          | 4.00                      | 0.2118                         | 0.0282                         | 173                            | 4.145            | NA          |
| likely         | 2.00           | 5.00                      | 0.2177                         | 0.0164                         | 151                            | 3.119            | 6.33        |
| lady           | 8.00           | 4.00                      | 0.1527                         | 0.0073                         | 180                            | 4.044            | 3.68        |
| large          | 10.00          | 4.00                      | 0.0638                         | 0.0014                         | 361                            | 3.325            | 5.74        |
| chance         | 9.00           | 4.00                      | 0.2494                         | 0.0279                         | 131                            | 4.090            | 7.78        |
| child          | 6.00           | 4.00                      | 0.1722                         | 0.0102                         | 213                            | 3.905            | 5.15        |
| children       | 0.00           | 7.00                      | 0.4161                         | 0.082                          | 355                            | 3.951            | 4.10        |
| charge         | 9.00           | 4.00                      | 0.0413                         | 0.0019                         | 122                            | 3.659            | 7.50        |
| chief          | 9.00           | 3.00                      | 0.0645                         | 0.0017                         | 119                            | 3.559            | 7.53        |
| thing          | 22.00          | 3.00                      | 0.0912                         | 0.0057                         | 333                            | 4.745            | 4.58        |
| thought        | 14.00          | 3.00                      | 0.0899                         | 0.0018                         | 515                            | 4.615            | 5.89        |
| thousand       | 1.00           | 6.00                      | 0.2493                         | 0.0517                         | 97                             | 3.548            | 6.60        |
| Thursday       | 1.00           | 6.00                      | 0.1192                         | 0.0029                         | 33                             | 3.091            | NA          |
| think          | 20.00          | 4.00                      | 0.1320                         | 0.0118                         | 433                            | 5.137            | 4.75        |
| <b>Average</b> | <b>8.45</b>    | <b>4.45</b>               | <b>0.1818</b>                  | <b>0.0195</b>                  | <b>244.65</b>                  | <b>3.992</b>     | <b>5.47</b> |

**Reference**

Kučera, H., & Francis, W. N. (1967). *Computational analysis of present-day American English*. Providence, RI: Brown University Press.
