# Supplementary material
Source: publisher figshare collection journal article supplement (https://asha.figshare.com/articles/dataset/_/7336055)
Supplement: Supplementary file 3 [file 1]

**Supplemental Material S2.** Neighborhood density and phonotactic probability measurements for the nonwords (NWs).

| NW             | Density <sup>a</sup> | Number of phonemes | Phoneme probability sum | Biphone probability sum |
|----------------|----------------------|--------------------|-------------------------|-------------------------|
| .iɪfɪm         | 0.00                 | 5.00               | 0.1906                  | 0.0108                  |
| .iɪfɪt         | 2.00                 | 5.00               | 0.2452                  | 0.0128                  |
| .ɪɛndɑf        | 0.00                 | 6.00               | 0.2889                  | 0.0375                  |
| .ɪlɔɪz         | 0.00                 | 5.00               | 0.2046                  | 0.0126                  |
| .ɪɑʊdʒ         | 7.00                 | 3.00               | 0.0791                  | 0.0007                  |
| lɛgɛɪd         | 0.00                 | 5.00               | 0.178                   | 0.0068                  |
| lɑʊwɪɪ         | 0.00                 | 4.00               | 0.0537                  | 0.0005                  |
| looʃɪgəl       | 0.00                 | 7.00               | 0.2472                  | 0.0076                  |
| leɪgɔʒə        | 0.00                 | 5.00               | 0.1436                  | 0.0062                  |
| lɑpə           | 2.00                 | 4.00               | 0.1416                  | 0.0035                  |
| ʃɑʊndə         | 2.00                 | 5.00               | 0.2132                  | 0.0271                  |
| ʃɔɪndʒ         | 1.00                 | 4.00               | 0.1216                  | 0.003                   |
| ʃɑɪndʒ         | 0.00                 | 5.00               | 0.1143                  | 0.0057                  |
| ʃoʊv           | 7.00                 | 3.00               | 0.067                   | 0.0009                  |
| ʃunəl          | 0.00                 | 5.00               | 0.261                   | 0.0133                  |
| θɛdvəl         | 0.00                 | 6.00               | 0.237                   | 0.0116                  |
| θɑləbi         | 0.00                 | 6.00               | 0.2714                  | 0.0177                  |
| θuzbiwin       | 0.00                 | 8.00               | 0.2367                  | 0.0066                  |
| θɪn            | 17.00                | 3.00               | 0.1373                  | 0.0035                  |
| θæli           | 10.00                | 4.00               | 0.2008                  | 0.0138                  |
| <b>Average</b> | <b>2.40</b>          | <b>4.90</b>        | <b>0.182</b>            | <b>0.0101</b>           |

<sup>a</sup>NW density represents the number of real words that differ from the NW by one phoneme. Specifically, the phonological form of the NW was inputted with the neighborhood criteria accounting for substitutions, deletions, and additions.
