# Supplementary material
Source: publisher figshare collection journal article supplement (https://asha.figshare.com/articles/dataset/_/7336055)
Supplement: Supplementary file 4 [file 1]

**Supplemental Material S1.** Neighborhood density, phonotactic probability, Kučera and Francis (1967) word frequency (WF), log 10 WF, and age of acquisition (in years) measurements (AoA) for the academic vocabulary (AV) words.

| AV word        | Density     | Number of phonemes | Phoneme probability sum | Biphone probability sum | Kučera & Francis WF | log 10 WF    | AoA         |
|----------------|-------------|--------------------|-------------------------|-------------------------|---------------------|--------------|-------------|
| region         | 5.00        | 5.00               | 0.2516                  | 0.0411                  | 76                  | 2.410        | 9.14        |
| rigid          | 1.00        | 5.00               | 0.2537                  | 0.0093                  | 24                  | 1.982        | 9.16        |
| remove         | 4.00        | 5.00               | 0.1756                  | 0.0229                  | 58                  | 2.868        | 5.67        |
| random         | 2.00        | 6.00               | 0.3659                  | 0.0447                  | 38                  | 2.719        | 9.33        |
| route          | 26.00       | 3.00               | 0.1371                  | 0.0015                  | 43                  | 3.037        | 11.40       |
| locate         | 1.00        | 5.00               | 0.2177                  | 0.0091                  | 16                  | 2.720        | 7.95        |
| layer          | 26.00       | 5.00               | 0.0859                  | 0.0023                  | 12                  | 2.272        | 8.28        |
| logical        | 3.00        | 7.00               | 0.2643                  | 0.0153                  | 34                  | 2.578        | 9.83        |
| lecture        | 2.00        | 6.00               | 0.2145                  | 0.0133                  | 16                  | 2.728        | 9.50        |
| labor          | 7.00        | 5.00               | 0.1508                  | 0.0063                  | 149                 | 2.794        | 8.28        |
| chapter        | 4.00        | 7.00               | 0.2583                  | 0.0194                  | 74                  | 2.782        | 6.42        |
| change         | 3.00        | 4.00               | 0.1536                  | 0.0076                  | 240                 | 4.089        | 4.26        |
| challenge      | 2.00        | 6.00               | 0.3291                  | 0.0284                  | 4                   | 3.006        | 7.55        |
| choice         | 3.00        | 3.00               | 0.0966                  | 0.0009                  | 113                 | 3.697        | 5.17        |
| channel        | 6.00        | 5.00               | 0.2438                  | 0.0191                  | 16                  | 3.096        | 5.79        |
| thoughtful     | 0.00        | 6.00               | 0.1646                  | 0.0051                  | 1                   | 2.601        | 9.00        |
| therapy        | 0.00        | 6.00               | 0.23                    | 0.0139                  | 12                  | 2.975        | 12.00       |
| thespian       | 0.00        | 7.00               | 0.0914                  | 0.0019                  | 1                   | 1.255        | NA          |
| theme          | 9.00        | 3.00               | 0.0919                  | 0.0073                  | 55                  | 2.852        | 8.50        |
| theory         | 7.00        | 4.00               | 0.2583                  | 0.0194                  | 129                 | 3.164        | 9.37        |
| <b>Average</b> | <b>5.55</b> | <b>5.15</b>        | <b>0.2017</b>           | <b>0.0144</b>           | <b>55.55</b>        | <b>2.781</b> | <b>8.24</b> |

**Reference**

Kučera, H., & Francis, W. N. (1967). *Computational analysis of present-day American English*. Providence, RI: Brown University Press.
