# Supplementary material
Source: publisher figshare collection journal article supplement (https://asha.figshare.com/articles/dataset/_/7336055)
Supplement: Supplementary file 5 [file 1]

**Supplemental Material S6.** Number of intervention trials (i.e., treatment dose) for each session and all children. Gray boxes identify sessions included in the intervention fidelity assessment.

| Number | Phoneme | Condition |  | 1   | 2   | 3   | 4   | 5   | 6   | 7   | 8   | 9   | 10  | 11  | 12  | 13  | 14  | 15  | 16  | 17  | 18  | 19  |
|--------|---------|-----------|--|-----|-----|-----|-----|-----|-----|-----|-----|-----|-----|-----|-----|-----|-----|-----|-----|-----|-----|-----|
| 1      | l       | AV        |  | 92  | 128 | 165 | 125 | 179 | 146 | 146 | 182 | 185 | 136 | 187 |     |     |     |     |     |     |     |     |
| 2      | ʃ       | AV        |  | 85  | 125 | 112 | 146 | 127 | 121 | 142 | 124 | 106 | 114 | 139 |     |     |     |     |     |     |     |     |
| 3      | ɹ       | AV        |  | 116 | 105 | 154 | 74  | 84  | 70  | 80  | 104 | 93  | 111 | 105 |     |     |     |     |     |     |     |     |
| 5      | ɹ       | AV        |  | 30  | 42  | 72  | 50  | 35  | 105 | 52  | 86  | 78  | 94  | 89  |     |     |     |     |     |     |     |     |
| 4      | ɹ       | AV        |  | 56  | 88  | 59  | 71  | 97  | 78  | 92  | 93  | 77  | 95  | 72  | 93  | 102 | 93  | 86  | 79  | 62  | 65  | 61  |
| 6      | ʃ       | AV        |  | 50  | 18  | 51  | 59  | 27  | 45  | 58  | 44  | 63  | 73  | 38  | 72  | 72  | 70  | 73  | 47  | 55  | 52  | 56  |
| 7      | l       | AV        |  | 82  | 71  | 62  | 55  | 89  | 82  | 55  | 63  | 73  | 56  | 61  | 73  | 95  | 67  | 92  | 83  | 81  | 84  | 95  |
| 8      | ɹ       | AV        |  | 53  | 60  | 76  | 88  | 66  | 72  | 87  | 79  | 74  | 71  | 73  | 86  | 72  | 54  | 138 | 100 | 91  | 84  | 90  |
| 9      | ɹ       | NW        |  | 80  | 102 | 73  | 115 | 136 | 130 | 123 | 120 | 117 | 90  | 88  |     |     |     |     |     |     |     |     |
| 12     | θ       | NW        |  | 80  | 85  | 90  | 75  | 43  | 76  | 77  | 66  | 71  | 81  | 69  |     |     |     |     |     |     |     |     |
| 13     | l       | NW        |  | 87  | 63  | 97  | 84  | 117 | 77  | 107 | 125 | 139 | 101 | 101 |     |     |     |     |     |     |     |     |
| 15     | ɹ       | NW        |  | 123 | 141 | 167 | 183 | 143 | 144 | 162 | 156 | 173 | 164 | 173 |     |     |     |     |     |     |     |     |
| 10     | ʃ       | NW        |  | 78  | 71  | 79  | 83  | 74  | 65  | 67  | 72  | 72  | 73  | 71  | 72  | 73  | 76  | 74  | 71  | 73  | 63  | 72  |
| 11     | ɹ       | NW        |  | 50  | 43  | 47  | 73  | 37  | 58  | 78  | 67  | 77  | 71  | 75  | 88  | 89  | 86  | 87  | 89  | 82  | 72  | 79  |
| 14     | ʃ       | NW        |  | 71  | 95  | 123 | 122 | 127 | 135 | 146 | 134 | 133 | 165 | 136 | 127 | 131 | 144 | 149 | 163 | 142 | 156 | 170 |
| 16     | ɹ       | NW        |  | 109 | 138 | 123 | 141 | 159 | 128 | 132 | 141 | 139 | 177 | 160 | 159 | 131 | 146 | 165 | 145 | 185 | 173 | 223 |
| 17     | θ       | HF        |  | 127 | 182 | 121 | 122 | 113 | 125 | 131 | 138 | 120 | 105 | 121 |     |     |     |     |     |     |     |     |
| 18     | ɹ       | HF        |  | 81  | 73  | 98  | 84  | 124 | 105 | 124 | 187 | 119 | 161 | 133 |     |     |     |     |     |     |     |     |
| 19     | ʃ       | HF        |  | 74  | 100 | 101 | 127 | 103 | 116 | 131 | 72  | 137 | 137 | 94  |     |     |     |     |     |     |     |     |
| 20     | ɹ       | HF        |  | 57  | 81  | 108 | 137 | 73  | 20  | 0   | 107 | 124 | 94  | 92  |     |     |     |     |     |     |     |     |
| 21     | l       | HF        |  | 31  | 48  | 83  | 113 | 85  | 88  | 108 | 91  | 107 | 102 | 95  | 117 | 89  | 109 | 91  | 80  | 69  | 79  | 69  |
| 22     | ʃ       | HF        |  | 84  | 91  | 149 | 118 | 78  | 107 | 116 | 95  | 127 | 117 | 129 | 135 | 128 | 147 | 120 | 137 | 107 | 113 | 127 |
| 23     | θ       | HF        |  | 61  | 127 | 127 | 127 | 96  | 127 | 104 | 110 | 127 | 127 | 127 | 127 | 127 | 127 | 166 | 127 | 127 | 127 | 230 |
| 24     | θ       | HF        |  | 118 | 131 | 130 | 144 | 147 | 108 | 153 | 134 | 136 | 151 | 178 | 173 | 173 | 187 | 125 | 49  | 92  | 145 | 114 |
